# Supplementary material for: Robust, quantitative tools for modelling ex-vivo expansion of haematopoietic stem cells and progenitors
Source: Royal Society of Chemistry journal article supplement (doi:10.1039/c2mb05439f), 2012-01-26
Supplement: c2mb05439f.pdf [file c2mb05439f.pdf]

## Supplementary information

Figure S1 Correlation matrices and dendrograms for independent and dependent variables in models

### Nucleated cells (NC)

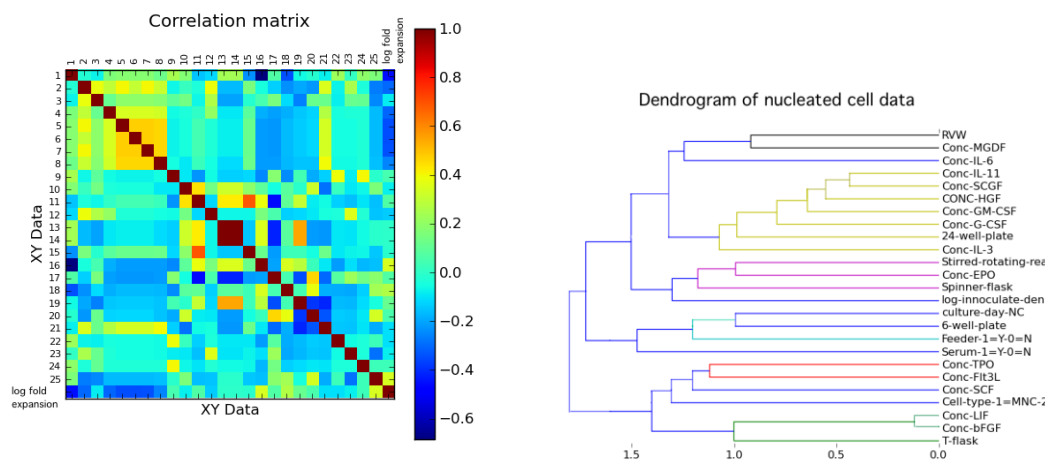

1 logID, 2 [IL-3], 3 [IL-6], 4 [G-CSF], 5 [SCGF], 6 [HGF], 7 [IL-11], 8 [GM-CSF], 9 [EPO], 10 [SCF], 11 [FL], 12 [MGDF], 13 [bFGF], 14 [LIF], 15 [TPO], 16 Cell-type-1=MNC-2=cd34+, 17 Serum-1=Y-0=N, 18 Feeder-1=Y-0=N, 19 T-flask, 20 6-well-plate, 21 24-well-plate, 22 Spinner-flask, 23 RVW, 24 Stirred-rotating-reactor, 25 culture-day

### CD34+

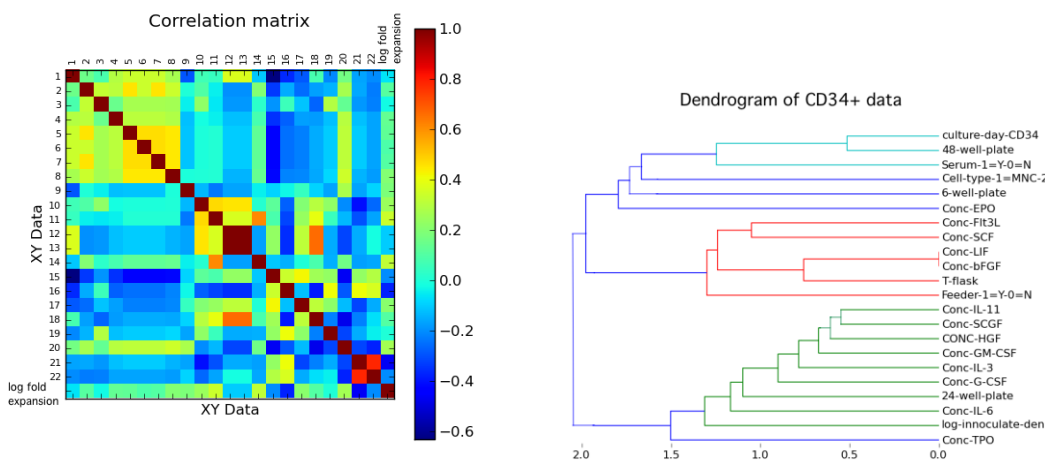

1 logID, 2 [IL-3], 3 [IL-6], 4 [G-CSF], 5 [SCGF], 6 [HGF], 7 [IL-11], 8 [GM-CSF], 9 [EPO], 10 [SCF], 11 [FL], 12 [bFGF], 13 [LIF], 14 [TPO], 15 Cell-type-1=MNC-2=cd34+, 16 Serum-1=Y-0=N, 17 Feeder-1=Y-0=N, 18 T-flask, 19 6-well-plate, 20 24-well-plate, 21 48-well-plate, 22 culture-day

## CFC

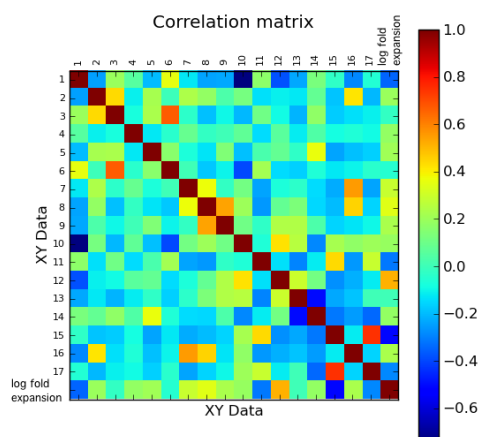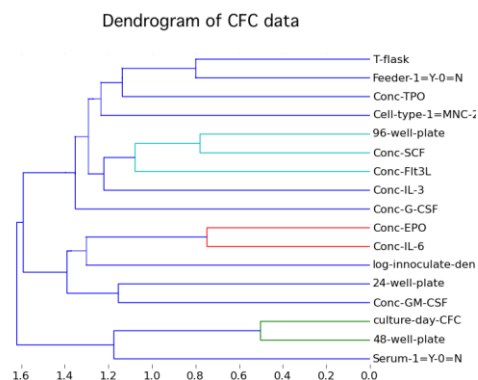

1 logID, 2 [IL-3], 3 [IL-6], 4 [G-CSF], 5 [GM-CSF], 6 [EPO], 7 [SCF], 8 [FL], 9 [TPO], 10 Cell-type-1=MNC-2=cd34+, 11 Serum-1=Y-0=N, 12 Feeder-1=Y-0=N, 13 T-flask, 14 24-well-plate, 15 48-well-plate, 16 96-well-plate, 17 culture-day

## CFU-GM

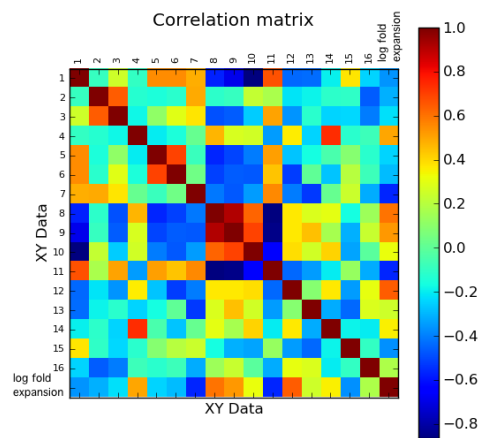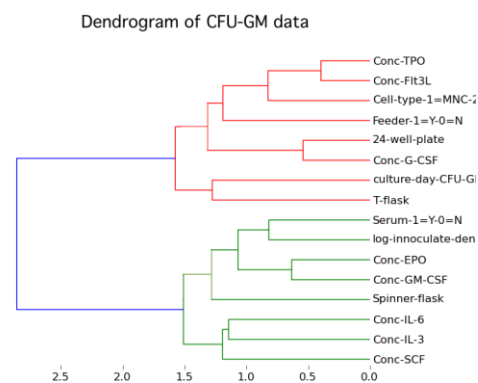

1 logID, 2 [IL-3], 3 [IL-6], 4 [G-CSF], 5 [GM-CSF], 6 [EPO], 7 [SCF], 8 [FL], 9 [TPO], 10 Cell-type-1=MNC-2=cd34+, 11 Serum-1=Y-0=N, 12 Feeder-1=Y-0=N, 13 T-flask, 14 24-well-plate, 15 Spinner-flask, 16 culture-day

## BFU-E

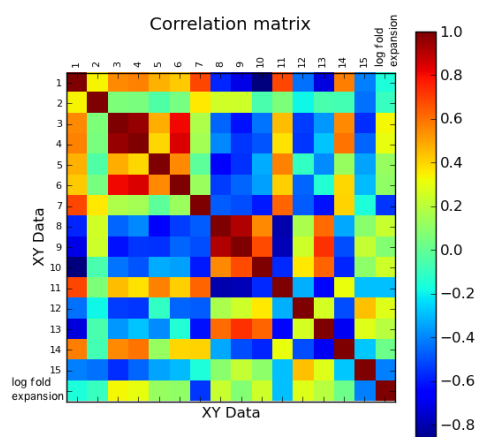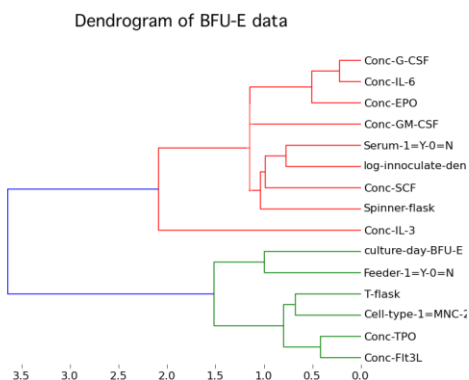

1 logID, 2 [IL-3], 3 [IL-6], 4 [G-CSF], 5 [GM-CSF], 6 [EPO], 7 [SCF], 8 [FL], 9 [TPO], 10 Cell-type-1=MNC-2=cd34+, 11 Serum-1=Y-0=N, 12 Feeder-1=Y-0=N, 13 T-flask, 14 Spinner-flask, 15 culture-day

## LTC-IC

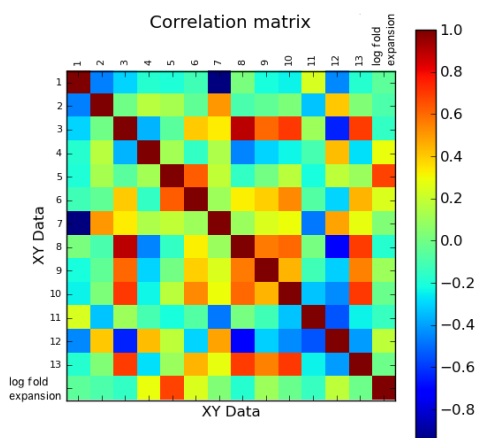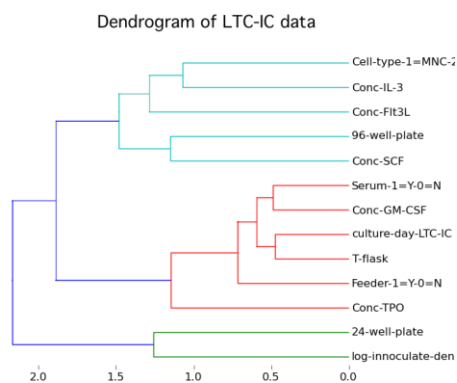

1 log-D, 2 [IL-3], 3 [GM-CSF], 4 [SCF], 5 [FL], 6 [TPO], 7 Cell-type-1=MNC-2=cd34+, 8 Serum-1=Y-0=N, 9 Feeder-1=Y-0=N, 10 T-flask, 11 24-well-plate, 12 96-well-plate, 13 culture-day

Table S1. Performance of MLR-EM and BRANN bioreactor models ( $r^2$  values) with varying numbers of hidden layer nodes in the BRANN models. The number of experiments for each cell type are shown in brackets.

| Cell type      | Data set       | MLR  | BRANN<br>1 node | BRANN<br>2 nodes | BRANN<br>3 nodes |
|----------------|----------------|------|-----------------|------------------|------------------|
| NC<br>(207)    | all            | 0.62 | 0.59            | 0.81             | 0.83             |
|                | Training (80%) | 0.59 | 0.52            | 0.75             | 0.78             |
|                | Test (20%)     | 0.47 | 0.60            | 0.67             | 0.66             |
| CD34+<br>(134) | all            | 0.56 | 0.48            | 0.49             | 0.49             |
|                | Training (80%) | 0.59 | 0.50            | 0.51             | 0.51             |
|                | Test (20%)     | 0.37 | 0.38            | 0.39             | 0.39             |
| CFC<br>(96)    | all            | 0.66 | 0.61            | 0.61             | 0.71             |
|                | Training (80%) | 0.70 | 0.61            | 0.60             | 0.62             |
|                | Test (20%)     | 0.47 | 0.57            | 0.56             | 0.55             |
| CFU-GM<br>(44) | all            | 0.79 | 0.69            | 0.70             | 0.70             |
|                | Training (80%) | 0.79 | 0.67            | 0.68             | 0.68             |
|                | Test (20%)     | 0.92 | 0.89            | 0.89             | 0.89             |
| BFU-E<br>(27)  | all            | 0.91 | 0.79            | 0.81             | 0.89             |
|                | Training (80%) | 0.94 | 0.80            | 0.84             | 0.83             |
|                | Test (20%)     | 0.91 | 0.82            | 0.87             | 0.90             |
| LTC-IC<br>(24) | all            | 0.73 | 0.50            | 0.50             | 0.50             |
|                | Training (80%) | 0.85 | 0.43            | 0.48             | 0.48             |
|                | Test (20%)     | 0.76 | 0.71            | 0.73             | 0.73             |

Table S2. Performance of MLR-EM and BRANNLP bioreactor models ( $r^2$  values) with varying degrees of sparsity imposed. The number of parameters in each model is shown in brackets. BRANNLP with no imposed sparsity may still prune less relevant parameters resulting in fewer than the maximum number in the model.

| Cell type | Sparsity index | MLR-EM    | BRANN<br>1 node | BRANN<br>2 nodes | BRANN<br>3 nodes |
|-----------|----------------|-----------|-----------------|------------------|------------------|
| NC        | 0              | 0.62 (25) | 0.61 (21)       | 0.80 (25)        | 0.82 (25)        |
|           | 1              | 0.60 (20) |                 |                  |                  |
|           | 2              | 0.57 (15) | 0.61 (14)       | 0.71 (13)        | 0.84 (17)        |
|           | 3              | 0.50 (9)  |                 |                  | 0.66 (12)        |
|           | 4              | 0.41 (5)  | 0.51 (6)        | 0.61 (5)         |                  |
| CD34+     | 0              | 0.56 (22) | 0.50 (18)       | 0.50 (18)        | 0.51 (17)        |
|           | 1              |           |                 |                  |                  |
|           | 2              | 0.53 (16) |                 |                  |                  |
|           | 3              |           | 0.52 (11)       | 0.49 (9)         | 0.59 (10)        |
|           | 4              | 0.44 (7)  | 0.44 (6)        | 0.48 (5)         | 0.48 (7)         |
| CFC       | 0              | 0.66 (17) | 0.62 (13)       | 0.62 (13)        | 0.62 (9)         |
|           | 1              | 0.62 (12) | 0.63 (8)        | 0.62 (10)        | 0.63 (8)         |
|           | 2              | 0.54 (6)  |                 |                  |                  |
|           | 3              | 0.443 (5) | 0.63 (7)        | 0.63 (8)         | 0.63 (7)         |
|           | 4              | 0.37 (3)  |                 |                  |                  |
| CFU-GM    | 0              | 0.79 (16) | 0.74 (11)       | 0.74 (10)        | 0.74 (9)         |
|           | 1              | 0.75 (8)  | 0.75 (7)        | 0.75 (6)         | 0.75 (7)         |
|           | 2              | 0.69 (5)  |                 |                  |                  |
|           | 3              | 0.72 (4)  | 0.61 (3)        | 0.72 (4)         | 0.74 (4)         |
| BFU-E     | 0              | 0.91 (15) | 0.85 (10)       | 0.85 (10)        | 0.84 (11)        |
|           | 1              | 0.78 (6)  | 0.86 (7)        | 0.84 (6)         |                  |
|           | 2              | 0.73 (5)  |                 |                  | 0.84 (5)         |
|           | 3              | 0.45 (3)  | 0.62 (4)        | 0.80 (5)         | 0.75 (4)         |
| LTC-IC    | 0              | 0.73 (13) |                 |                  |                  |
|           | 1              | 0.70 (10) | 0.68 (8)        | 0.68 (6)         | 0.58 (4)         |
|           | 2              | 0.68 (6)  | 0.65 (4)        | 0.65 (4)         | 0.65 (4)         |
|           | 3              | 0.58 (5)  | 0.48 (1)        | 0.48 (1)         | 0.48 (1)         |
